# Supplementary material for: Exosomal miR-146a-5p mediates macrophage polarization through TRAF6/NF-κB signaling in endometriosis
Source: Research Square preprint supplement (doi:10.21203/rs.3.rs-4988177/v1), 2024-10-08
Supplement: Supplementary file 1 [file 185b49fbed923ee2ec5f7af0.docx]

# Table S1. Primer sequences for quantitative PCR.

| **Gene** | **Primers (5’-3’)** |
| --- | --- |
| Homo sapiens CD86  Homo sapiens iNOS  Homo sapiens CD163 | F GCTGCTGCTGCTGCTGCT  R GGAGTGGAGTGGAGTGGAGTG  F TCCTGGACATTACGACCCCT  R CTCTGAGGGCTGACACAAGG  F TCCTTGTGGGATTGTCCTGC  R CTTGAGGAAACTGCAAGCCG |
| Homo sapiens CD206 | F TGACCATCACCATTCCATA  R CGTGGTCAATGTCCACTTTG |
| Homo sapiens TRAF6 | F TGGATGCCAAACCAGAGC  R ATGTCAAAGCGGGTGGAG |
| Homo sapiens GAPDH | F AATCCCATCACCATCTTC  R AGGCTGTTGTCATACTTC |

**Table S2** Primer sequences for miRNA.

| **miRNA** | **Primers (5’-3’)** |
| --- | --- |
| hsa-miR-146a-5p | F CAGTGCGTGTCGTGGAGT  R GGGTGAGAACTGAATTCCA |
| Homo sapiens U6 | F CTCGCTTCGGCAGCACA  R AACGCTTCACGAATTTGCGT |

# Table S3. Antibody list.

| **Primary antibody** | **Company** | **Catalog No.** |
| --- | --- | --- |
| TRAF6 | Abcam | Ab137452 |
| NF-κB p65 | CST | 8242 |
| p-NF-KBp65 | CST | 3033 |
| GAPDH | Proteintech | 60004-1-Ig |
